# Supplementary material for: Reactive coaxial electrospinning of ZrP/ZrO2 nanofibres
Source: Royal Society of Chemistry journal article supplement (doi:10.1039/c4ta01383b), 2014-01-01

Supporting Information

## Reactive Coaxial Electrospinning of ZrP/ZrO<sub>2</sub> Nanofibres

S.Subianto<sup>a</sup>, A. Donnadio<sup>b</sup>, S. Cavaliere<sup>a</sup>, M. Pica<sup>b</sup>, M. Casciola<sup>b</sup>, D.J. Jones<sup>a</sup>, and J. Rozière<sup>a</sup>

Wavelength Dispersive X-Ray Spectroscopy of the ZrP/ZrO<sub>2</sub> fibres showing the distribution of Zr, P and O in the fibres.

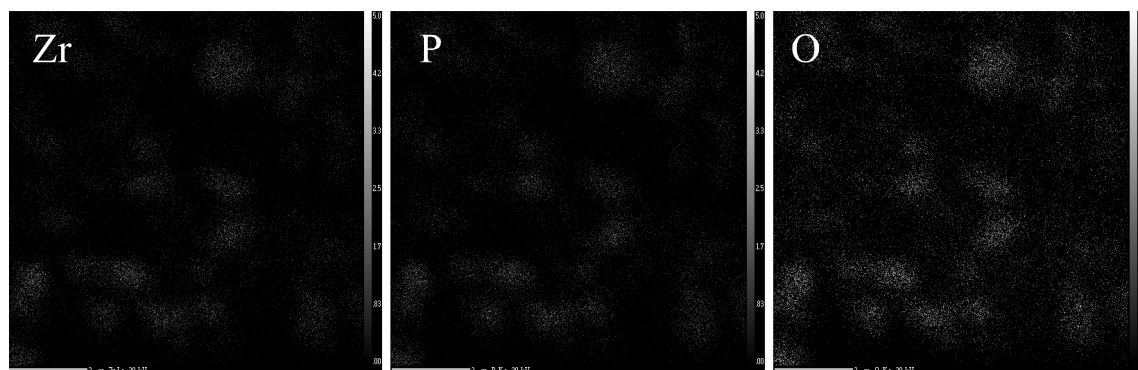

Solid state MAS 31P NMR spectra of the ZrP nanofibres after calcination and acid treatment with: H<sub>3</sub>PO<sub>4</sub> at room temperature for 48h, H<sub>3</sub>PO<sub>4</sub> under reflux for 12h, and HCl under reflux for 12h.

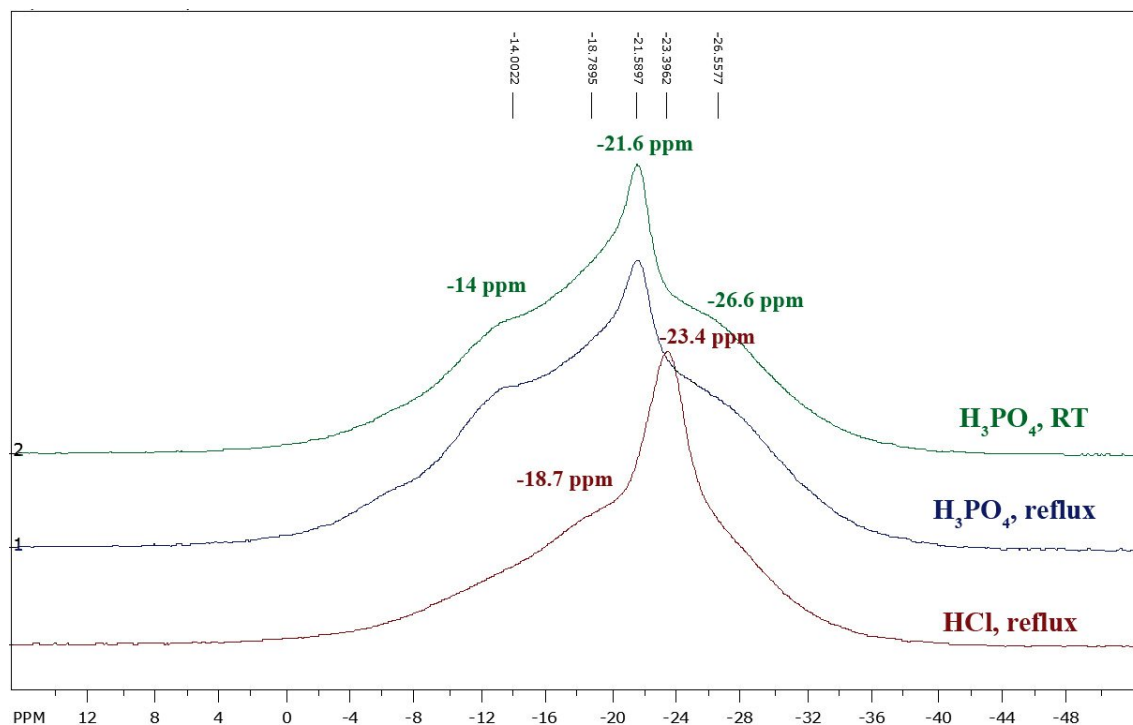

X-ray diffraction pattern of ZrP/ZrO<sub>2</sub> nanofibres.

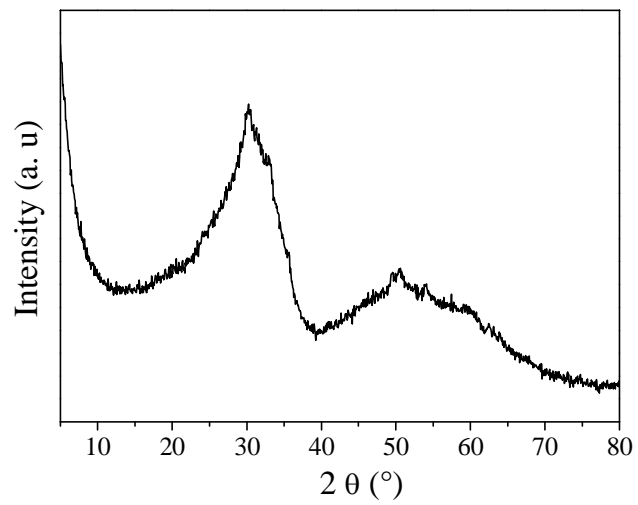

Supplement: c4ta01383b1.pdf [file c4ta01383b1.pdf]
